# Supplementary material for: Curvature-driven feedback on aggregation-diffusion of proteins in lipid bilayers
Source: Royal Society of Chemistry journal article supplement (doi:10.1039/d1sm00502b), 2021-01-01
Supplement: d1sm00502b2.pdf [file d1sm00502b2.pdf]

The movies are kept in a google drive folder, accessible with the following link:

<https://drive.google.com/drive/folders/1k4SXuRshJIPoPNnGVODJRpsZVkpe5diU?usp=sharing>
